# Supplementary material
Source: ML conference proceedings conference paper supplement (https://openreview.net/forum?id=XIuDe2A0jDL)
Supplement: supplementary_material [file attachment]

## Appendix

**Algorithm.** The pseudocode formulation of the proposed GIL algorithm is given in Algorithm 1. We note that the presentation of the algorithm is independent of the specific MDP model used. Our specific formulation of an MDP model of the Maximal Independent Set (mIS) problem is given in Section 4.1.

**Extended Results.** We show an extended version of the results in Table 2, in which reported values are separated by the number of players  $n$ . We also include an additional analysis that evaluates the win rate percentage for each of the methods instead of average reward, since the average reward metric may be sensitive to outliers (i.e., game instances with abnormally large or small objective function values). This is shown in Table 3, with ties being broken randomly in case there is more than one winner. The full results of hyperparameter optimization are too expansive to report directly as tables, and have been included in the supplementary material in the `mcts_hyps.csv` and `il_hyps.csv` files for UCT and GIL respectively. For SA, the lowest tested value  $\epsilon = 10$  of the simulated annealing rate was optimal across all settings tested (we did not explore lower values since the method would become significantly more expensive to run, and is already slow as shown in Figure 6).

**Implementation.** Our implementation is available at <https://github.com/VictorDarvariu/solving-graph-pgg> as Docker containers together with instructions that enable reproducing (up to hardware differences) all the results reported in the paper, including tables and figures. For complete instructions to reproduce the results, please consult the `README.md` file in the repository. We implement all approaches and baselines in Python using a variety of numerical and scientific computing packages [27, 25, 40, 43, 50]. For GIL, we use the PyTorch implementation of *structure2vec* provided by the original authors [14].

**Data Availability.** The provided implementation contains the necessary code and instructions to generate the synthetic data on which the experiments are carried out. Please consult the `README.md` file in the root of the repository.

**Infrastructure and Runtimes.** Experiments were carried out on an internal cluster of 8 machines, each equipped with 2 Intel Xeon E5-2630 v3 processors and 128GB RAM. On this infrastructure, the experiments reported in this paper took approximately 14 days to complete.

---

**Algorithm 1** Graph Imitation Learning (GIL).

---

```

1: procedure GIL( $\mathbf{G}^{train}, \mathbf{G}^{eval}$ )
2:    $\Theta = \text{INITPARAMS}()$  ▷ Randomly initialize policy  $\hat{\pi}$  and underlying GNN.
3:    $\mathcal{D} = \text{COLLECTDATASET}(\mathbf{G}^{train})$ 
4:   while true do
5:      $b = \text{SAMPLEBATCH}(\mathcal{D})$ 
6:     update  $\Theta$  by  $\text{SGD}(b, \mathcal{L})$  ▷ See Equation 2 for loss term.
7:      $\text{CHECKSTOPPINGCRITERION}(\hat{\pi}, \mathbf{G}^{eval})$  ▷ Validate performance on held-out set.
8:   return policy  $\hat{\pi}$ 

9: procedure COLLECTDATASET( $\mathbf{G}^{train}$ )
10:  for  $G$  in  $\mathbf{G}^{train}$  do
11:     $S_0 = \text{INITSTATE}(G)$ 
12:    while  $|\mathcal{A}(S_t)| > 0$  do
13:       $d = \text{RUNMCTS}(S_t)$  ▷ Collect a demonstration by MCTS policy  $\pi$ .
14:       $\mathcal{D} = \mathcal{D} \cup \{d\}$  ▷ Add demonstration to dataset.
15:       $A_t = \text{ROBUSTCHILD}(d)$ 
16:       $S_{t+1} = \mathcal{P}(S_t, A_t)$  ▷ Apply deterministic transition model.
17:       $t+ = 1$ 
18:  return  $\mathcal{D}$ 

19: procedure RUNMCTS( $S$ )
20:  create root node  $v$  from  $S$ 
21:  for  $i = 0$  to  $n_{sims}$  do
22:     $v_l = \text{TREEPOLICY}(v)$ 
23:     $R = \text{RANDOMDEFAULTPOLICY}(v_l)$ 
24:     $\text{BACKUP}(v_l, R)$  ▷ Backup reward (proportional to objective  $f$ ).
25:   $\mathbf{v} = []$ 
26:  for  $a$  in  $\mathcal{A}(S)$  do ▷ Construct vector of visit counts for all actions.
27:     $\mathbf{v}.\text{append}(C(S, a))$ 
28:  return  $(S, \mathcal{A}(S), n, \mathbf{v})$ 

```

---

Table 2: Mean rewards obtained by the methods split by cost setting, graph model, objective function, and number of players.

| c  | G  | f  | n   | Rand              | TH    | TLC   | BR                | PT                | SA                       | UCT                      | GIL (ours)               |
|----|----|----|-----|-------------------|-------|-------|-------------------|-------------------|--------------------------|--------------------------|--------------------------|
| HC | BA | F  | 15  | 0.757 $\pm$ 0.005 | 0.814 | 0.785 | 0.753 $\pm$ 0.006 | 0.797 $\pm$ 0.016 | 0.825 $\pm$ 0.001        | <b>0.848</b> $\pm$ 0.000 | 0.845 $\pm$ 0.001        |
|    |    |    | 25  | 0.750 $\pm$ 0.005 | 0.806 | 0.774 | 0.747 $\pm$ 0.007 | 0.794 $\pm$ 0.017 | 0.820 $\pm$ 0.002        | <b>0.842</b> $\pm$ 0.000 | 0.839 $\pm$ 0.000        |
|    |    |    | 50  | 0.742 $\pm$ 0.007 | 0.797 | 0.773 | 0.741 $\pm$ 0.005 | 0.788 $\pm$ 0.016 | 0.811 $\pm$ 0.001        | <b>0.835</b> $\pm$ 0.000 | 0.832 $\pm$ 0.001        |
|    |    |    | 75  | 0.741 $\pm$ 0.006 | 0.797 | 0.772 | 0.736 $\pm$ 0.004 | 0.789 $\pm$ 0.014 | 0.810 $\pm$ 0.001        | <b>0.831</b> $\pm$ 0.000 | 0.828 $\pm$ 0.002        |
|    |    | SW | 100 | 0.737 $\pm$ 0.005 | 0.796 | 0.767 | 0.732 $\pm$ 0.004 | 0.787 $\pm$ 0.012 | 0.808 $\pm$ 0.001        | <b>0.829</b> $\pm$ 0.000 | 0.826 $\pm$ 0.001        |
|    |    |    | 15  | 0.708 $\pm$ 0.007 | 0.793 | 0.738 | 0.702 $\pm$ 0.009 | 0.763 $\pm$ 0.020 | 0.806 $\pm$ 0.001        | <b>0.827</b> $\pm$ 0.000 | 0.825 $\pm$ 0.000        |
|    |    |    | 25  | 0.702 $\pm$ 0.008 | 0.782 | 0.728 | 0.698 $\pm$ 0.011 | 0.762 $\pm$ 0.023 | 0.801 $\pm$ 0.002        | <b>0.820</b> $\pm$ 0.000 | 0.819 $\pm$ 0.000        |
|    |    |    | 50  | 0.694 $\pm$ 0.010 | 0.774 | 0.726 | 0.691 $\pm$ 0.007 | 0.756 $\pm$ 0.021 | 0.791 $\pm$ 0.001        | <b>0.813</b> $\pm$ 0.000 | 0.811 $\pm$ 0.000        |
|    |    |    | 75  | 0.692 $\pm$ 0.009 | 0.774 | 0.726 | 0.684 $\pm$ 0.007 | 0.759 $\pm$ 0.018 | 0.790 $\pm$ 0.001        | <b>0.809</b> $\pm$ 0.000 | 0.806 $\pm$ 0.001        |
|    |    | ER | 100 | 0.688 $\pm$ 0.008 | 0.774 | 0.720 | 0.680 $\pm$ 0.007 | 0.757 $\pm$ 0.016 | 0.788 $\pm$ 0.001        | <b>0.807</b> $\pm$ 0.001 | 0.804 $\pm$ 0.001        |
|    |    |    | 15  | 0.806 $\pm$ 0.004 | 0.839 | 0.861 | 0.807 $\pm$ 0.002 | 0.839 $\pm$ 0.007 | 0.849 $\pm$ 0.002        | <b>0.895</b> $\pm$ 0.000 | 0.892 $\pm$ 0.001        |
|    |    |    | 25  | 0.841 $\pm$ 0.002 | 0.865 | 0.889 | 0.840 $\pm$ 0.001 | 0.881 $\pm$ 0.004 | 0.879 $\pm$ 0.002        | <b>0.925</b> $\pm$ 0.000 | 0.920 $\pm$ 0.001        |
|    |    |    | 50  | 0.893 $\pm$ 0.001 | 0.909 | 0.934 | 0.892 $\pm$ 0.001 | 0.930 $\pm$ 0.001 | 0.924 $\pm$ 0.001        | <b>0.958</b> $\pm$ 0.000 | 0.954 $\pm$ 0.000        |
|    | WS | F  | 75  | 0.916 $\pm$ 0.001 | 0.928 | 0.953 | 0.915 $\pm$ 0.001 | 0.946 $\pm$ 0.001 | 0.940 $\pm$ 0.000        | <b>0.970</b> $\pm$ 0.000 | 0.965 $\pm$ 0.006        |
|    |    |    | 100 | 0.930 $\pm$ 0.001 | 0.940 | 0.962 | 0.930 $\pm$ 0.001 | 0.957 $\pm$ 0.001 | 0.951 $\pm$ 0.001        | <b>0.977</b> $\pm$ 0.000 | 0.969 $\pm$ 0.011        |
|    |    |    | 15  | 0.782 $\pm$ 0.004 | 0.823 | 0.841 | 0.782 $\pm$ 0.001 | 0.820 $\pm$ 0.008 | 0.836 $\pm$ 0.002        | <b>0.882</b> $\pm$ 0.000 | 0.878 $\pm$ 0.001        |
|    |    |    | 25  | 0.829 $\pm$ 0.002 | 0.856 | 0.877 | 0.827 $\pm$ 0.001 | 0.871 $\pm$ 0.005 | 0.872 $\pm$ 0.002        | <b>0.918</b> $\pm$ 0.000 | 0.912 $\pm$ 0.000        |
|    |    | SW | 50  | 0.887 $\pm$ 0.001 | 0.905 | 0.931 | 0.887 $\pm$ 0.001 | 0.927 $\pm$ 0.002 | 0.921 $\pm$ 0.001        | <b>0.956</b> $\pm$ 0.000 | 0.948 $\pm$ 0.002        |
|    |    |    | 75  | 0.913 $\pm$ 0.001 | 0.925 | 0.951 | 0.912 $\pm$ 0.001 | 0.944 $\pm$ 0.001 | 0.938 $\pm$ 0.000        | <b>0.969</b> $\pm$ 0.000 | 0.965 $\pm$ 0.001        |
|    |    |    | 100 | 0.928 $\pm$ 0.001 | 0.939 | 0.960 | 0.928 $\pm$ 0.001 | 0.955 $\pm$ 0.001 | 0.950 $\pm$ 0.001        | <b>0.976</b> $\pm$ 0.000 | 0.971 $\pm$ 0.002        |
|    |    | F  | 15  | 0.818 $\pm$ 0.007 | 0.817 | 0.868 | 0.814 $\pm$ 0.005 | 0.833 $\pm$ 0.007 | 0.848 $\pm$ 0.006        | <b>0.904</b> $\pm$ 0.002 | 0.903 $\pm$ 0.000        |
|    |    |    | 25  | 0.799 $\pm$ 0.006 | 0.807 | 0.867 | 0.801 $\pm$ 0.004 | 0.817 $\pm$ 0.006 | 0.828 $\pm$ 0.003        | <b>0.891</b> $\pm$ 0.000 | 0.890 $\pm$ 0.000        |
|    |    |    | 50  | 0.801 $\pm$ 0.002 | 0.805 | 0.864 | 0.801 $\pm$ 0.003 | 0.819 $\pm$ 0.005 | 0.830 $\pm$ 0.001        | <b>0.890</b> $\pm$ 0.000 | <b>0.890</b> $\pm$ 0.000 |
|    |    |    | 75  | 0.799 $\pm$ 0.002 | 0.800 | 0.862 | 0.801 $\pm$ 0.003 | 0.818 $\pm$ 0.003 | 0.827 $\pm$ 0.001        | <b>0.886</b> $\pm$ 0.000 | <b>0.886</b> $\pm$ 0.000 |
|    | IC | SW | 100 | 0.800 $\pm$ 0.001 | 0.802 | 0.863 | 0.801 $\pm$ 0.002 | 0.818 $\pm$ 0.004 | 0.828 $\pm$ 0.001        | 0.887 $\pm$ 0.000        | <b>0.888</b> $\pm$ 0.000 |
|    |    |    | 15  | 0.795 $\pm$ 0.009 | 0.797 | 0.850 | 0.790 $\pm$ 0.006 | 0.811 $\pm$ 0.008 | 0.832 $\pm$ 0.008        | <b>0.889</b> $\pm$ 0.002 | 0.888 $\pm$ 0.000        |
|    |    |    | 25  | 0.775 $\pm$ 0.008 | 0.784 | 0.847 | 0.779 $\pm$ 0.005 | 0.797 $\pm$ 0.007 | 0.812 $\pm$ 0.003        | <b>0.875</b> $\pm$ 0.000 | 0.873 $\pm$ 0.001        |
|    |    |    | 50  | 0.778 $\pm$ 0.003 | 0.784 | 0.845 | 0.780 $\pm$ 0.005 | 0.799 $\pm$ 0.005 | 0.815 $\pm$ 0.001        | <b>0.876</b> $\pm$ 0.000 | 0.875 $\pm$ 0.000        |
|    |    | F  | 75  | 0.777 $\pm$ 0.002 | 0.779 | 0.843 | 0.780 $\pm$ 0.003 | 0.798 $\pm$ 0.003 | 0.812 $\pm$ 0.001        | <b>0.871</b> $\pm$ 0.000 | <b>0.871</b> $\pm$ 0.000 |
|    |    |    | 100 | 0.778 $\pm$ 0.001 | 0.781 | 0.844 | 0.780 $\pm$ 0.003 | 0.798 $\pm$ 0.004 | 0.813 $\pm$ 0.001        | 0.871 $\pm$ 0.000        | <b>0.872</b> $\pm$ 0.000 |
|    |    | BA | 15  | 0.837 $\pm$ 0.001 | 0.851 | —     | 0.837 $\pm$ 0.001 | 0.846 $\pm$ 0.005 | <b>0.855</b> $\pm$ 0.000 | <b>0.855</b> $\pm$ 0.000 | <b>0.855</b> $\pm$ 0.000 |
|    |    |    | 25  | 0.835 $\pm$ 0.001 | 0.845 | —     | 0.835 $\pm$ 0.000 | 0.844 $\pm$ 0.006 | 0.851 $\pm$ 0.000        | <b>0.852</b> $\pm$ 0.000 | 0.850 $\pm$ 0.000        |
|    |    |    | 50  | 0.832 $\pm$ 0.000 | 0.842 | —     | 0.832 $\pm$ 0.000 | 0.840 $\pm$ 0.006 | <b>0.848</b> $\pm$ 0.000 | 0.846 $\pm$ 0.000        | 0.845 $\pm$ 0.001        |
|    |    |    | 75  | 0.832 $\pm$ 0.001 | 0.841 | —     | 0.832 $\pm$ 0.001 | 0.839 $\pm$ 0.005 | <b>0.846</b> $\pm$ 0.000 | 0.843 $\pm$ 0.000        | 0.843 $\pm$ 0.001        |
|    | ER | SW | 100 | 0.831 $\pm$ 0.001 | 0.840 | —     | 0.832 $\pm$ 0.001 | 0.838 $\pm$ 0.004 | <b>0.844</b> $\pm$ 0.000 | 0.840 $\pm$ 0.000        | 0.842 $\pm$ 0.001        |
|    |    |    | 15  | 0.710 $\pm$ 0.008 | 0.794 | —     | 0.703 $\pm$ 0.010 | 0.760 $\pm$ 0.021 | 0.805 $\pm$ 0.001        | <b>0.807</b> $\pm$ 0.000 | <b>0.807</b> $\pm$ 0.000 |
|    |    |    | 25  | 0.702 $\pm$ 0.009 | 0.779 | —     | 0.698 $\pm$ 0.010 | 0.759 $\pm$ 0.023 | 0.799 $\pm$ 0.001        | <b>0.800</b> $\pm$ 0.000 | <b>0.800</b> $\pm$ 0.000 |
|    |    |    | 50  | 0.695 $\pm$ 0.008 | 0.776 | —     | 0.692 $\pm$ 0.007 | 0.756 $\pm$ 0.020 | 0.792 $\pm$ 0.001        | <b>0.793</b> $\pm$ 0.000 | <b>0.793</b> $\pm$ 0.001 |
|    |    | F  | 75  | 0.689 $\pm$ 0.009 | 0.774 | —     | 0.682 $\pm$ 0.006 | 0.756 $\pm$ 0.017 | 0.789 $\pm$ 0.001        | <b>0.790</b> $\pm$ 0.000 | <b>0.790</b> $\pm$ 0.001 |
|    |    |    | 100 | 0.687 $\pm$ 0.008 | 0.772 | —     | 0.679 $\pm$ 0.006 | 0.755 $\pm$ 0.016 | 0.785 $\pm$ 0.001        | <b>0.786</b> $\pm$ 0.000 | <b>0.786</b> $\pm$ 0.001 |
|    |    |    | 15  | 0.844 $\pm$ 0.001 | 0.860 | —     | 0.844 $\pm$ 0.001 | 0.855 $\pm$ 0.003 | 0.868 $\pm$ 0.001        | <b>0.873</b> $\pm$ 0.000 | 0.872 $\pm$ 0.000        |
|    |    |    | 25  | 0.865 $\pm$ 0.001 | 0.880 | —     | 0.864 $\pm$ 0.001 | 0.881 $\pm$ 0.001 | 0.892 $\pm$ 0.001        | <b>0.899</b> $\pm$ 0.000 | 0.898 $\pm$ 0.001        |
|    |    | SW | 50  | 0.901 $\pm$ 0.001 | 0.916 | —     | 0.900 $\pm$ 0.001 | 0.918 $\pm$ 0.000 | 0.927 $\pm$ 0.000        | <b>0.932</b> $\pm$ 0.000 | 0.931 $\pm$ 0.000        |
|    |    |    | 75  | 0.921 $\pm$ 0.000 | 0.931 | —     | 0.921 $\pm$ 0.000 | 0.935 $\pm$ 0.000 | 0.943 $\pm$ 0.000        | <b>0.948</b> $\pm$ 0.000 | 0.943 $\pm$ 0.006        |
|    |    |    | 100 | 0.934 $\pm$ 0.001 | 0.943 | —     | 0.934 $\pm$ 0.001 | 0.945 $\pm$ 0.000 | 0.953 $\pm$ 0.000        | <b>0.957</b> $\pm$ 0.000 | 0.951 $\pm$ 0.006        |
|    | WS | F  | 15  | 0.780 $\pm$ 0.002 | 0.818 | —     | 0.777 $\pm$ 0.002 | 0.807 $\pm$ 0.007 | 0.834 $\pm$ 0.001        | <b>0.843</b> $\pm$ 0.000 | 0.841 $\pm$ 0.000        |
|    |    |    | 25  | 0.829 $\pm$ 0.002 | 0.855 | —     | 0.827 $\pm$ 0.001 | 0.856 $\pm$ 0.002 | 0.873 $\pm$ 0.001        | <b>0.884</b> $\pm$ 0.000 | 0.882 $\pm$ 0.001        |
|    |    |    | 50  | 0.886 $\pm$ 0.001 | 0.906 | —     | 0.885 $\pm$ 0.001 | 0.909 $\pm$ 0.001 | 0.920 $\pm$ 0.000        | <b>0.926</b> $\pm$ 0.000 | 0.922 $\pm$ 0.002        |
|    |    |    | 75  | 0.912 $\pm$ 0.001 | 0.925 | —     | 0.912 $\pm$ 0.001 | 0.930 $\pm$ 0.000 | 0.939 $\pm$ 0.000        | <b>0.944</b> $\pm$ 0.000 | 0.942 $\pm$ 0.002        |
|    |    | SW | 100 | 0.928 $\pm$ 0.001 | 0.939 | —     | 0.928 $\pm$ 0.001 | 0.942 $\pm$ 0.000 | 0.950 $\pm$ 0.000        | <b>0.954</b> $\pm$ 0.000 | 0.951 $\pm$ 0.004        |
|    |    |    | 15  | 0.843 $\pm$ 0.003 | 0.844 | —     | 0.841 $\pm$ 0.003 | 0.846 $\pm$ 0.003 | 0.856 $\pm$ 0.002        | 0.864 $\pm$ 0.001        | <b>0.865</b> $\pm$ 0.001 |
|    |    |    | 25  | 0.841 $\pm$ 0.001 | 0.843 | —     | 0.843 $\pm$ 0.002 | 0.848 $\pm$ 0.002 | 0.856 $\pm$ 0.001        | 0.861 $\pm$ 0.000        | <b>0.863</b> $\pm$ 0.000 |
|    |    |    | 50  | 0.841 $\pm$ 0.001 | 0.843 | —     | 0.842 $\pm$ 0.002 | 0.846 $\pm$ 0.002 | 0.856 $\pm$ 0.000        | 0.861 $\pm$ 0.000        | <b>0.864</b> $\pm$ 0.000 |
|    |    | F  | 75  | 0.841 $\pm$ 0.000 | 0.842 | —     | 0.842 $\pm$ 0.001 | 0.847 $\pm$ 0.001 | 0.856 $\pm$ 0.000        | 0.861 $\pm$ 0.000        | <b>0.864</b> $\pm$ 0.000 |
|    |    |    | 100 | 0.842 $\pm$ 0.001 | 0.843 | —     | 0.842 $\pm$ 0.001 | 0.846 $\pm$ 0.001 | 0.856 $\pm$ 0.000        | 0.860 $\pm$ 0.000        | <b>0.864</b> $\pm$ 0.000 |
|    |    | SW | 15  | 0.779 $\pm$ 0.007 | 0.783 | —     | 0.774 $\pm$ 0.007 | 0.790 $\pm$ 0.007 | 0.812 $\pm$ 0.004        | <b>0.829</b> $\pm$ 0.001 | 0.828 $\pm$ 0.002        |
|    |    |    | 25  | 0.775 $\pm$ 0.006 | 0.781 | —     | 0.782 $\pm$ 0.006 | 0.794 $\pm$ 0.006 | 0.812 $\pm$ 0.002        | 0.823 $\pm$ 0.000        | <b>0.826</b> $\pm$ 0.000 |
|    |    |    | 50  | 0.777 $\pm$ 0.003 | 0.782 | —     | 0.778 $\pm$ 0.005 | 0.791 $\pm$ 0.005 | 0.813 $\pm$ 0.001        | 0.824 $\pm$ 0.000        | <b>0.829</b> $\pm$ 0.001 |
|    |    |    | 75  | 0.777 $\pm$ 0.001 | 0.780 | —     | 0.780 $\pm$ 0.003 | 0.792 $\pm$ 0.003 | 0.812 $\pm$ 0.001        | 0.822 $\pm$ 0.000        | <b>0.828</b> $\pm$ 0.001 |
|    |    |    | 100 | 0.778 $\pm$ 0.002 | 0.781 | —     | 0.779 $\pm$ 0.003 | 0.791 $\pm$ 0.003 | 0.812 $\pm$ 0.000        | 0.821 $\pm$ 0.000        | <b>0.828</b> $\pm$ 0.000 |

Table 3: Win rates (%) for the different methods.

| <b>c</b> | <b>G</b> | <b>f</b> | <b>n</b> | Rand  | TH    | TLC   | BR    | PT     | SA            | UCT           | GIL (ours)    |
|----------|----------|----------|----------|-------|-------|-------|-------|--------|---------------|---------------|---------------|
| HC       | BA       | F        | 15       | 1.800 | 1.000 | 0.400 | 0.900 | 17.100 | 9.300         | <b>43.100</b> | 26.400        |
|          |          |          | 25       | 0.400 | 0.300 | 0.400 | 0.100 | 20.200 | 5.000         | <b>47.900</b> | <b>25.700</b> |
|          |          |          | 50       | 0.000 | 0.000 | 0.000 | 0.000 | 12.900 | 2.300         | <b>62.800</b> | 22.000        |
|          |          |          | 75       | 0.000 | 0.000 | 0.100 | 0.000 | 13.400 | 0.800         | <b>66.400</b> | 19.300        |
|          |          |          | 100      | 0.000 | 0.000 | 0.000 | 0.000 | 11.200 | 0.700         | <b>73.800</b> | 14.300        |
|          |          |          | 15       | 1.800 | 0.700 | 0.400 | 0.900 | 18.400 | 12.000        | <b>39.500</b> | 26.300        |
|          |          |          | 25       | 0.300 | 0.100 | 0.400 | 0.300 | 20.600 | 8.900         | <b>41.500</b> | 27.900        |
|          |          |          | 50       | 0.100 | 0.000 | 0.000 | 0.000 | 14.900 | 3.600         | <b>60.800</b> | 20.600        |
|          |          |          | 75       | 0.100 | 0.100 | 0.100 | 0.000 | 15.400 | 2.200         | <b>62.600</b> | 19.500        |
|          |          |          | 100      | 0.000 | 0.000 | 0.000 | 0.000 | 13.000 | 2.000         | <b>68.400</b> | 16.600        |
|          |          | SW       | 15       | 0.900 | 0.100 | 1.100 | 0.900 | 7.700  | 5.200         | <b>54.600</b> | 29.500        |
|          |          |          | 25       | 0.300 | 0.000 | 0.200 | 0.100 | 5.000  | 2.400         | <b>64.800</b> | <b>27.200</b> |
|          |          |          | 50       | 0.000 | 0.000 | 0.600 | 0.000 | 3.100  | 0.900         | <b>65.500</b> | 29.900        |
|          |          |          | 75       | 0.000 | 0.000 | 0.600 | 0.000 | 1.700  | 0.200         | <b>64.400</b> | 33.100        |
|          |          |          | 100      | 0.000 | 0.000 | 0.300 | 0.000 | 1.200  | 0.400         | <b>67.800</b> | 30.300        |
|          | ER       | F        | 15       | 0.800 | 0.200 | 1.100 | 0.600 | 7.300  | 5.700         | <b>53.800</b> | 30.500        |
|          |          |          | 25       | 0.200 | 0.100 | 0.500 | 0.100 | 4.900  | 2.400         | <b>60.600</b> | 31.200        |
|          |          |          | 50       | 0.000 | 0.000 | 0.800 | 0.000 | 2.700  | 1.500         | <b>74.800</b> | 20.200        |
|          |          |          | 75       | 0.000 | 0.000 | 0.500 | 0.000 | 1.700  | 0.100         | <b>69.000</b> | <b>28.700</b> |
|          |          | SW       | 100      | 0.000 | 0.000 | 0.200 | 0.000 | 1.400  | 0.000         | <b>73.500</b> | 24.900        |
|          |          |          | 15       | 0.300 | 0.000 | 0.800 | 0.200 | 0.700  | 3.100         | <b>58.200</b> | 36.700        |
|          |          |          | 25       | 0.000 | 0.000 | 0.600 | 0.000 | 0.500  | 0.500         | <b>57.200</b> | 41.200        |
|          |          |          | 50       | 0.000 | 0.000 | 0.100 | 0.000 | 0.000  | 0.000         | <b>55.700</b> | 44.200        |
|          |          |          | 75       | 0.000 | 0.000 | 0.000 | 0.000 | 0.000  | 0.000         | <b>50.700</b> | 49.300        |
|          |          |          | 100      | 0.000 | 0.000 | 0.000 | 0.000 | 0.000  | 0.000         | 43.700        | <b>56.300</b> |
|          |          |          | 15       | 0.600 | 0.000 | 0.700 | 0.300 | 0.900  | 3.100         | <b>55.800</b> | 38.600        |
|          |          |          | 25       | 0.000 | 0.000 | 0.500 | 0.000 | 0.400  | 1.200         | <b>61.600</b> | 36.300        |
|          |          |          | 50       | 0.000 | 0.000 | 0.000 | 0.000 | 0.000  | 0.000         | <b>60.600</b> | 39.400        |
|          |          |          | 75       | 0.000 | 0.000 | 0.000 | 0.000 | 0.000  | 0.000         | 49.800        | <b>50.200</b> |
|          |          |          | 100      | 0.000 | 0.000 | 0.000 | 0.000 | 0.000  | 0.000         | 47.200        | <b>52.800</b> |
|          | WS       | F        | 15       | 0.300 | 0.000 | 0.800 | 0.200 | 0.700  | 3.100         | <b>58.200</b> | 36.700        |
|          |          |          | 25       | 0.000 | 0.000 | 0.600 | 0.000 | 0.500  | 0.500         | <b>57.200</b> | 41.200        |
|          |          |          | 50       | 0.000 | 0.000 | 0.100 | 0.000 | 0.000  | 0.000         | <b>55.700</b> | 44.200        |
|          |          |          | 75       | 0.000 | 0.000 | 0.000 | 0.000 | 0.000  | 0.000         | <b>50.700</b> | 49.300        |
|          |          |          | 100      | 0.000 | 0.000 | 0.000 | 0.000 | 0.000  | 0.000         | 43.700        | <b>56.300</b> |
|          |          | SW       | 15       | 0.600 | 0.000 | 0.700 | 0.300 | 0.900  | 3.100         | <b>55.800</b> | 38.600        |
|          |          |          | 25       | 0.000 | 0.000 | 0.500 | 0.000 | 0.400  | 1.200         | <b>61.600</b> | 36.300        |
|          |          |          | 50       | 0.000 | 0.000 | 0.000 | 0.000 | 0.000  | 0.000         | <b>60.600</b> | 39.400        |
|          |          |          | 75       | 0.000 | 0.000 | 0.000 | 0.000 | 0.000  | 0.000         | 49.800        | <b>50.200</b> |
|          |          |          | 100      | 0.000 | 0.000 | 0.000 | 0.000 | 0.000  | 0.000         | 47.200        | <b>52.800</b> |
|          |          |          | 15       | 0.600 | 0.000 | 0.700 | 0.300 | 0.900  | 3.100         | <b>55.800</b> | 38.600        |
|          |          |          | 25       | 0.000 | 0.000 | 0.500 | 0.000 | 0.400  | 1.200         | <b>61.600</b> | 36.300        |
|          |          |          | 50       | 0.000 | 0.000 | 0.000 | 0.000 | 0.000  | 0.000         | <b>60.600</b> | 39.400        |
|          |          |          | 75       | 0.000 | 0.000 | 0.000 | 0.000 | 0.000  | 0.000         | 49.800        | <b>50.200</b> |
|          |          |          | 100      | 0.000 | 0.000 | 0.000 | 0.000 | 0.000  | 0.000         | 47.200        | <b>52.800</b> |
|          | IC       | BA       | 15       | 4.500 | 1.400 | —     | 3.100 | 18.200 | 24.700        | <b>25.100</b> | 23.000        |
|          |          |          | 25       | 2.100 | 0.400 | —     | 2.200 | 22.800 | 22.900        | <b>31.700</b> | 17.900        |
|          |          |          | 50       | 0.400 | 1.200 | —     | 0.600 | 21.400 | <b>34.000</b> | 25.400        | 17.000        |
|          |          |          | 75       | 0.200 | 0.800 | —     | 0.300 | 20.300 | <b>40.200</b> | 20.500        | 17.700        |
|          |          |          | 100      | 0.000 | 0.100 | —     | 0.100 | 21.700 | <b>48.200</b> | 14.900        | 15.000        |
|          |          | SW       | 15       | 1.900 | 1.800 | —     | 1.600 | 19.200 | 24.200        | 25.600        | <b>25.700</b> |
|          |          |          | 25       | 0.600 | 0.900 | —     | 0.400 | 22.800 | 24.600        | <b>27.200</b> | 23.500        |
|          |          |          | 50       | 0.100 | 0.600 | —     | 0.000 | 21.200 | 24.300        | <b>27.600</b> | 26.200        |
|          |          |          | 75       | 0.000 | 0.300 | —     | 0.000 | 20.200 | 25.800        | <b>25.100</b> | <b>28.600</b> |
|          |          |          | 100      | 0.000 | 0.000 | —     | 0.000 | 21.500 | 24.500        | 25.300        | <b>28.700</b> |
|          |          | ER       | 15       | 2.300 | 1.000 | —     | 2.400 | 9.600  | 20.300        | <b>35.300</b> | 29.100        |
|          |          |          | 25       | 0.600 | 0.300 | —     | 0.000 | 6.800  | 19.200        | <b>39.600</b> | 33.500        |
|          |          |          | 50       | 0.000 | 0.100 | —     | 0.000 | 1.900  | 17.000        | <b>43.600</b> | 37.400        |
|          |          |          | 75       | 0.000 | 0.100 | —     | 0.000 | 1.500  | 15.000        | <b>57.200</b> | 26.200        |
|          |          |          | 100      | 0.000 | 0.100 | —     | 0.000 | 0.500  | 14.000        | <b>55.700</b> | 29.700        |
|          |          | SW       | 15       | 2.300 | 0.800 | —     | 1.700 | 10.000 | 19.600        | <b>35.100</b> | 30.500        |
|          |          |          | 25       | 0.800 | 0.500 | —     | 0.300 | 7.500  | 18.700        | <b>42.100</b> | 30.100        |
|          |          |          | 50       | 0.200 | 0.400 | —     | 0.100 | 3.800  | 18.500        | <b>49.000</b> | 28.000        |
|          |          |          | 75       | 0.000 | 0.200 | —     | 0.000 | 1.200  | 12.600        | <b>49.600</b> | 36.400        |
|          |          |          | 100      | 0.000 | 0.100 | —     | 0.000 | 0.700  | 13.100        | <b>54.400</b> | <b>31.700</b> |
|          | WS       | F        | 15       | 1.200 | 0.000 | —     | 0.200 | 1.500  | 12.800        | 37.500        | <b>46.800</b> |
|          |          |          | 25       | 0.200 | 0.000 | —     | 1.200 | 2.500  | 14.800        | 36.200        | <b>45.100</b> |
|          |          |          | 50       | 0.000 | 0.000 | —     | 0.000 | 0.100  | 3.700         | <b>27.200</b> | <b>69.000</b> |
|          |          |          | 75       | 0.000 | 0.000 | —     | 0.000 | 0.000  | 1.300         | 18.400        | <b>80.300</b> |
|          |          |          | 100      | 0.000 | 0.000 | —     | 0.000 | 0.000  | 0.400         | 9.700         | <b>89.900</b> |
|          |          | SW       | 15       | 0.700 | 0.100 | —     | 1.000 | 2.300  | 15.400        | <b>41.400</b> | 39.100        |
|          |          |          | 25       | 0.000 | 0.100 | —     | 1.100 | 2.000  | 13.200        | 34.900        | <b>48.700</b> |
|          |          |          | 50       | 0.000 | 0.000 | —     | 0.000 | 0.100  | 2.800         | <b>27.200</b> | <b>69.900</b> |
|          |          |          | 75       | 0.000 | 0.000 | —     | 0.000 | 0.000  | 1.600         | 19.000        | <b>79.400</b> |
|          |          |          | 100      | 0.000 | 0.000 | —     | 0.000 | 0.000  | 0.600         | 12.000        | <b>87.400</b> |
